# Supplementary material for: Honey Bee Gut Microbiome Is Altered by In-Hive Pesticide Exposures
Source: Front Microbiol. 2016 Aug 16;7:1255. doi: 10.3389/fmicb.2016.01255 (PMC4985556; doi:10.3389/fmicb.2016.01255)
Supplement: Table S3 — Summary of ITS region biom table across different treatments (Excel file). [file Table3.XLSX]

## Sheet: biom_table_summary
Num samples: 24
Num observations: 555
Total count: 24214
Table density (fraction of non-zero values): 0.113
Counts/sample summary:
Min: 296.0
Max: 2280.0
Median: 989.500
Mean: 1008.917
Std. dev.: 462.318
Sample Label	Sample ID	Counts/sample detail:
3B.ITS	ConPB	296
12F.ITS	ChlMF	334
8B.ITS	ConMB	493
1F.ITS	CouPF	525
3F.ITS	ConPF	573
12B.ITS	ChlMB	609
1B.ITS	CouPB	642
11B.ITS	ChlPB	693
11F.ITS	ChlPF	775
9B.ITS	FluPB	873
7F.ITS	ConKF	899
10F.ITS	FluKF	956
6B.ITS	CouMB	1023
7B.ITS	ConKB	1103
10B.ITS	FluKB	1172
9F.ITS	FluPF	1236
5B.ITS	ChlKB	1241
5F.ITS	ChlKF	1252
8F.ITS	ConMF	1282
6F.ITS	CouMF	1305
2B.ITS	CouKB	1378
2F.ITS	CouKF	1425
4F.ITS	FluMF	1849
4B.ITS	FluMB	2280
